# Supplementary material
Source: publisher site journal article supplement (https://www.dovepress.com/article/578569)
Supplement: Supplementary file 1 [file 578569_Table%20S1-Dwiyati-Dove-Supplementary.docx]

**Table S1.** Searching strategies in each data based

| **Databased** | **Keyword and searching stategies** |
| --- | --- |
| Pubmed | ("Sexual Abuse Prevention" OR "Abuse Prevention" OR "Sexual Risk Reduction" OR "Child Protection")  AND  ("Adolescent"[MeSH] OR "Adolescence" OR "Intellectual Disabilities"[MeSH] OR "Learning Disabilities"[MeSH] OR "Developmental Disabilities"[MeSH])  AND  ("Educational Programs"[MeSH] OR "Prevention Programs" OR "Sexual Education" OR "School-Based Programs" OR "Curriculum" OR "Intervention Strategies") |
| Scopus | ("Sexual Abuse Prevention" OR "Sexual Violence" OR "Abuse Prevention" OR "Sexual Risk Reduction" OR "Child Protection")  AND  ("Adolescents" OR "Adolescence" OR "Intellectual Disabilities" OR "Learning Disabilities" OR "Developmental Disabilities" OR "Intellectual Disability" OR "Adolescents with Intellectual Disabilities")  AND  ("Educational Models" OR "Educational Programs" OR "Prevention Programs" OR "Sexual Education" OR "School-Based Programs" OR "Curriculum-Based Programs" OR "Intervention Strategies") |
| CINAHL | ("Sexual Abuse Prevention" OR "Child Abuse Prevention" OR "Sexual Violence" OR "Abuse Prevention Programs")  AND  ("Adolescents" OR "Adolescence" OR "Intellectual Disabilities" OR "Developmental Disabilities" OR "Learning Disabilities")  AND  ("Educational Models" OR "Educational Programs" OR "Prevention Programs" OR "Sexual Education" OR "School-Based Programs" OR "Intervention Programs") |
| Science Direct | ("Sexual Abuse Prevention" OR "Abuse Prevention")  AND  ("Adolescents" OR "Intellectual Disabilities")  AND  ("Educational Programs" OR "Prevention Programs" OR "Sexual Education") |
